# Supplementary material
Source: publisher site journal article supplement (https://www.dovepress.com/article/357183)
Supplement: Supplementary file 1 [file get_supplementary_file.php]

**Supplementary materials**

**Supplemental Result**

Of the 2234 growths of potential contaminants on blood cultures in 2117 patients with contaminate sampling, coagulase-negative *Staphylococcus* predominated (2082 isolates, 93.2%), followed by unidentified gram-positive bacilli (69 isolates, 3.1%), *Micrococcus* species (44, 2.0%), *Bacillus* species (21, 0.9%), *Clostridium perfringens* (13, 0.6%), and *Propionibacterium* species (5, 0.2%). Based on the criteria (as shown in Supplemental Table 1), contaminated rates in patients with the growth of various potential contaminants were listed in Supplemental Table 2.

**Supplemental Box 1.** Clinical criteria for true bacteraemia episodes in patients having the growth of potentially contaminated pathogens on blood cultures.

| One of the following clinical settings:  I. Patients with the same species isolated from two or more sets of blood cultures.  II. Patients with the same species isolated in one of the initial two sets of blood cultures and additional blood cultures, have systemic inflammation reaction syndrome. |
| --- |
| III. Septic patients with a species growing in one set of blood cultures and without an obvious evidence of infectious sources had at least one of the following:   1. Shock, metabolic acidosis, or disseminated intravascular coagulation. 2. Intravascular devices *a* or prostheses indwelling for > 48 hours. 3. Recipients of haemodialysis or peritoneal dialysis. |

Notes:Data from: Lee et al.16 *a* Including central venous catheters, temporary or permanent pacemakers, or arterial catheters.

**Supplemental Table 1.** Contaminated rates in patients with the growth of various potential contaminants on blood cultures

| Bacterial species | Contamination case No./ total case No. (%) |
| --- | --- |
| Coagulase-negative *Staphylococcus* | 1979/1994 (99.2%) |
| Gram-positive bacilli | 66/70 (94.3%) |
| *Micrococcus* species | 39/39 (100%) |
| *Bacillus* species | 18/18 (100%) |
| *Clostridium perfringens* | 11/11 (100%) |
| *Propionibacterium* species | 4/4 (100%) |
| Total | 2117/ 2136 (99.1%) |

**Supplemental Table 2. Patient information.**

| Variables | Case numbers (%)# |
| --- | --- |
| Age, median (interquartile range) | 70 (57 – 80) |
| Gender, male | 1609 (50.7) |
| Delayed AAT, hours, median (interquartile range) | 2.0 (1.0 – 7.4) |
| Inadequate source control during antimicrobial therapy | 98 (3.1) |
| MEDS, median (interquartile range) | 6 (3 – 12) |
| Syndrome in the emergency department |  |
| Sepsis | 1468 (46.3) |
| Septic shock | 627 (19.8) |
| Nursing-home residents | 174 (5.5) |
| Major comorbidities |  |
| Cardiovascular diseases | 1701 (53.6) |
| Diabetes mellitus | 1179 (37.2) |
| Malignancies | 948 (29.9) |
| Neurological diseases | 724 (22.8) |
| Chronic kidney diseases | 581 (18.3) |
| Liver cirrhosis | 397 (12.5) |
| Polymicrobial bacteraemia | 302 (9.5) |
| Major causative microorganisms |  |
| *Escherichia coli* | 1315 (41.5) |
| *Klebsiella* *pneumoniae* | 473 (14.9) |
| *Staphylococcus aureus* | 411 (13.0) |
| *Streptococcus* species | 384 (12.1) |
| *Pseudomonas* species | 128 (4.0) |
| *Enterococcus* species | 117 (3.7) |
| Major bacteraemia sources |  |
| Urinary tracts | 1027 (32.4) |
| Pneumonia | 465 (14.7) |
| Intra-abdominal | 383 (12.1) |
| Skin and soft-tissue | 305 (9.6) |
| Biliary tracts | 271 (8.5) |
| Liver abscess | 101 (3.2) |
| Crude mortality rates |  |
| 15-day | 360 (11.4) |
| 30-day | 469 (14.8) |

AAT = appropriate antimicrobial therapy; MEDS = Mortality in Emergency Department Sepsis,

#Data are expressed as numbers (%), unless indicated specifically
